# Supplementary material
Source: Springer Nature journal article supplement (https://www.springermedizin.de/resource/supplementary/12936_2008_624_MOESM2_ESM.pdf/9547850)

(a)

Less than 5 years old

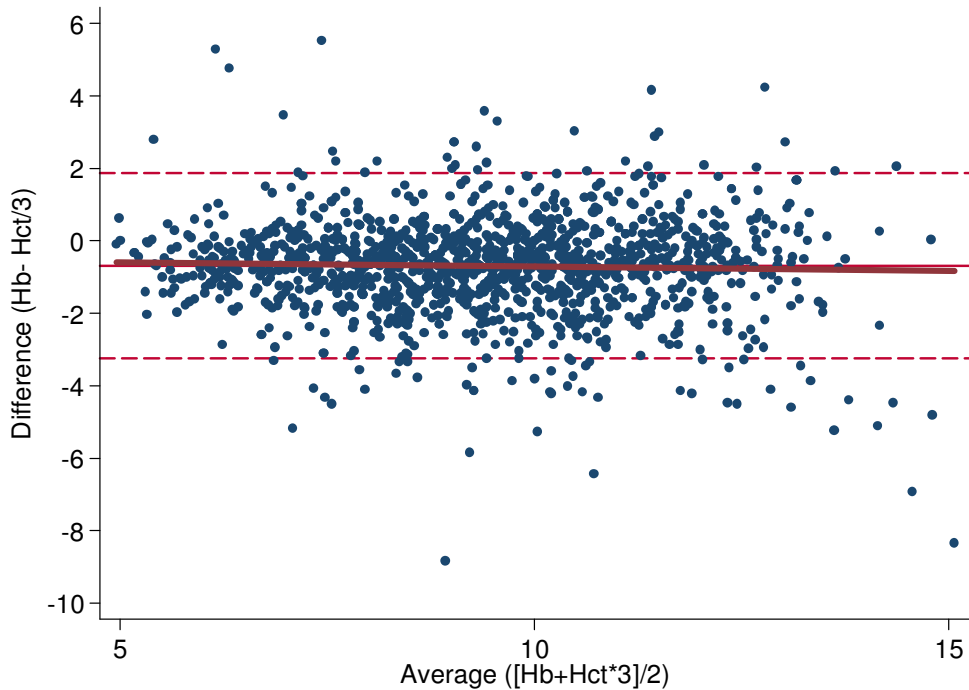

(b)

Aged 5 to 14

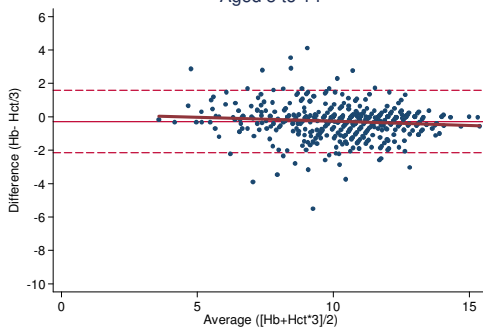

(c)

Aged 15+

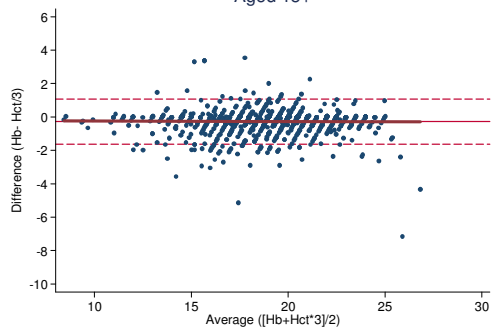

Supplement: MOESM2 [file 9547850]
